# Supplementary material
Source: PubMed Central journal article supplement (PMC10367055)
Supplement: mmc1.pdf [file mmc1.pdf]

## **Supplementary Information for**

Free energy perturbation calculations of mutation effects on SARS-CoV-2 RBD::ACE2 binding affinity

Alina P. Sergeeva, Phinikoula S. Katsamba, Junzhuo Liao, Jared M. Sampson, Fabiana Bahna, Seetha Mannepalli, Nicholas C. Morano, Lawrence Shapiro, Richard A. Friesner, Barry Honig

Corresponding authors –

Barry Honig [bh6@columbia.edu](mailto:bh6@columbia.edu)

Richard A. Friesner [raf8@columbia.edu](mailto:raf8@columbia.edu)

Lawrence Shapiro [lss8@columbia.edu](mailto:lss8@columbia.edu)

### **This PDF file includes:**

Figures S1 to S3

Tables S1 to S5

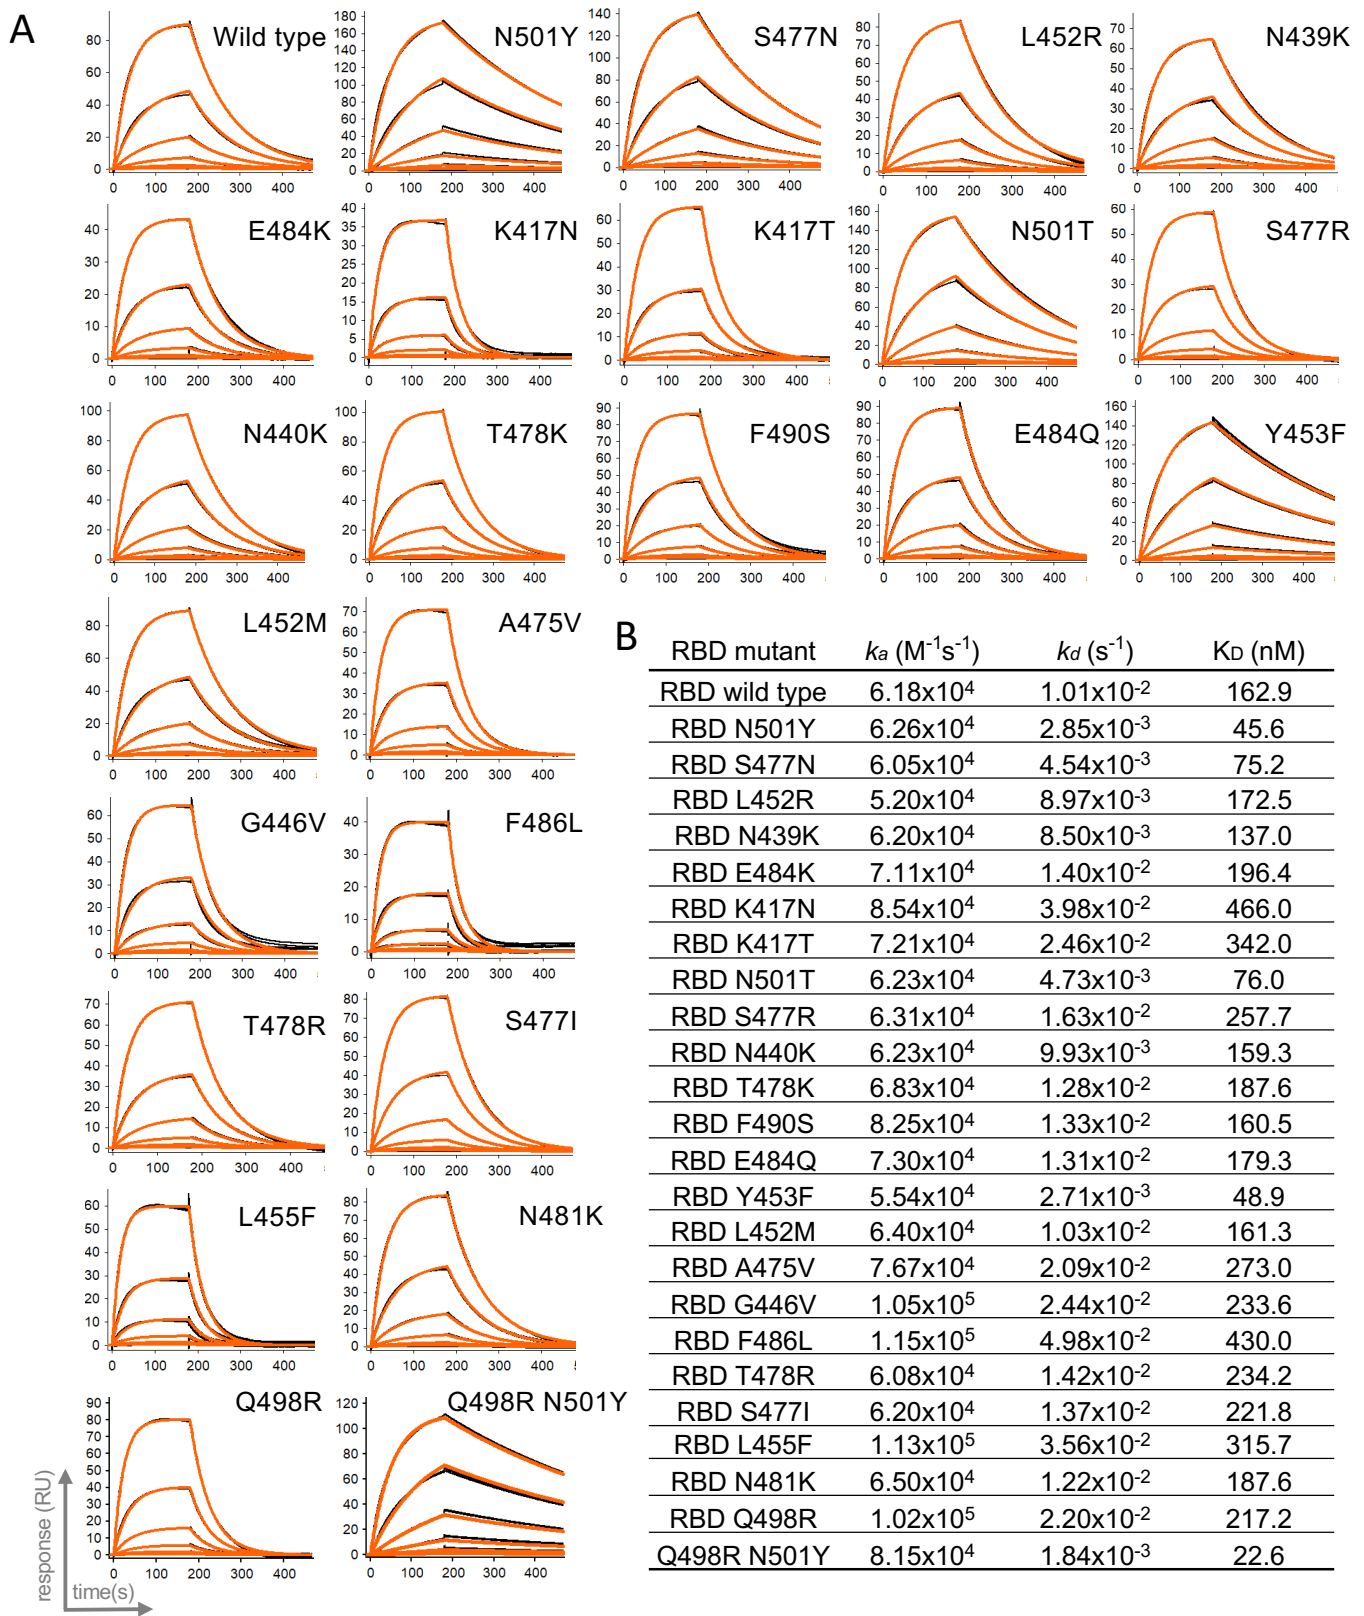

**Figure S1: SPR analysis of wt and mutant RBD/ACE2 binding affinities and kinetic parameters.** (A) SPR binding profiles for ACE2 binding to RBD and its mutants. The black traces represent experimental data, overlaid with the red traces which represent the 1:1 interaction model used to extrapolate kinetic parameters. (B) Kinetic parameters determined from the fits shown in A. The error of the fit for  $k_a$  is  $(0.003-0.05) \times 10^4 M^{-1}s^{-1}$ , for  $k_d$  is  $(0.004-0.6) \times 10^{-3} s^{-1}$  and for  $K_D$  is 0.07-7 nM.

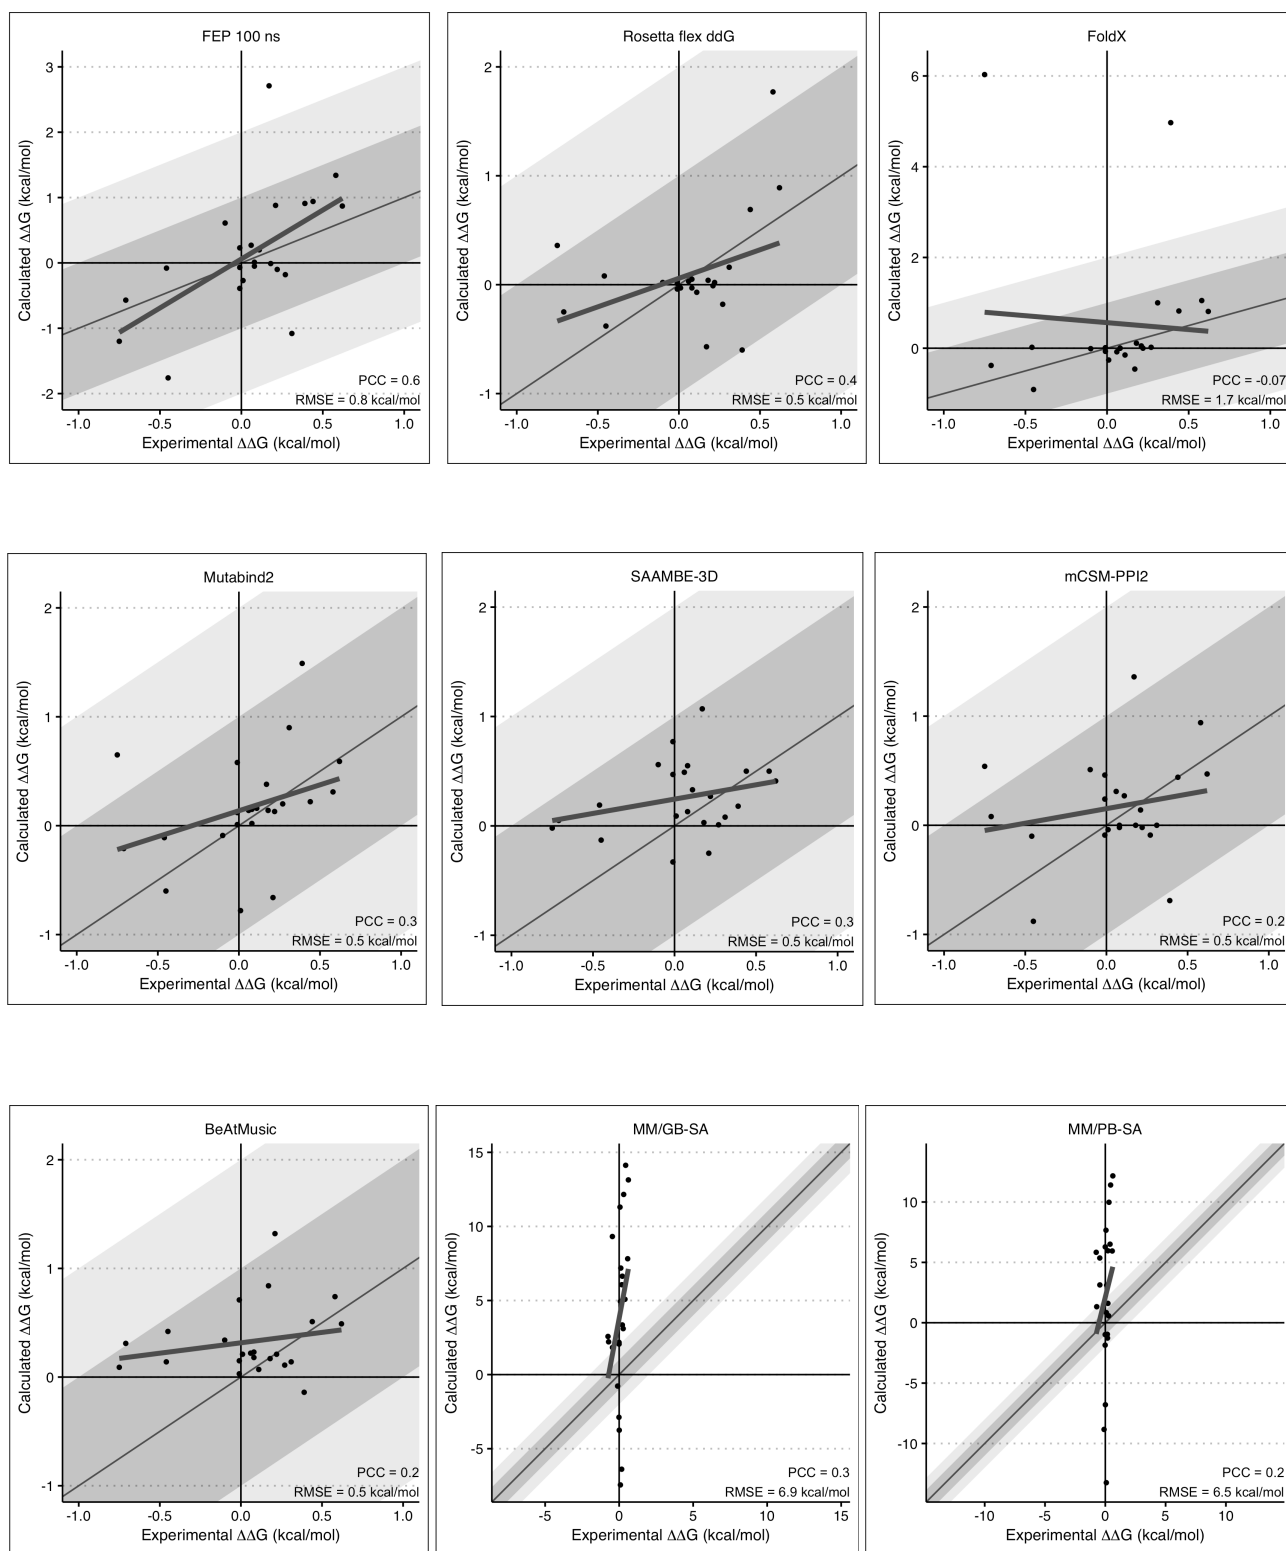

Figure S2. Correlation plots for data in Table 2.

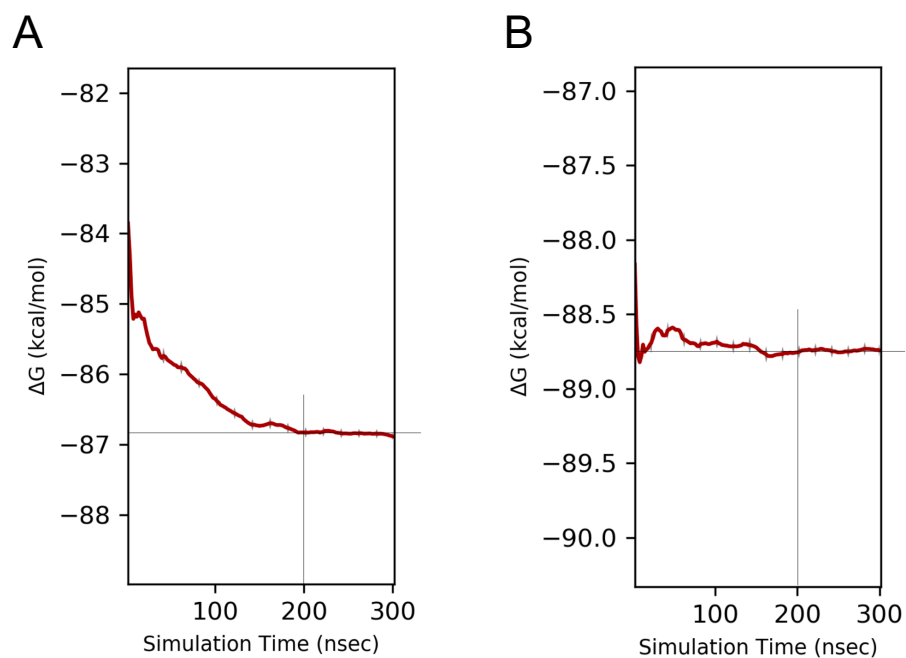

**Figure S3. Energy convergence plots for Q498R mutation.** Convergence plots of the FEP calculations for the complex leg (A) and the solvent leg (B) of the Q498R mutation simulated for 300ns to demonstrate that energy convergence is achieved at 200ns.  $\Delta\Delta G$  (mutation) =  $\Delta G$  (complex leg) -  $\Delta G$  (solvent leg);  $\Delta G$  =  $G$ (mutant) -  $G$ (wild-type).

**Table S1. Occurrence frequency of single point SARS-CoV-2 RBD mutations in the US in 2021.**

| RBD mutation | Total frequency, Jan 04'21 | Total frequency, Jan 20'21 | Total frequency, Feb 19'21 | Total frequency, Mar 10'21 | Total frequency, April 18'21 | Total frequency, May 24'21 | Total frequency, June 7'21 | Total frequency, July 26'21 | Total frequency, Aug 31'21 | Total frequency, Oct 31'21 | Total frequency, Dec 12'21 | Total frequency, Dec 31'21 |
|--------------|----------------------------|----------------------------|----------------------------|----------------------------|------------------------------|----------------------------|----------------------------|-----------------------------|----------------------------|----------------------------|----------------------------|----------------------------|
| L452R        | 213                        | 465                        | 1141                       | 1247                       | 10056                        | 25430                      | 77577                      | 180087                      | 492276                     | 1094585                    | 1663119                    | 1875810                    |
| T478K        | 13                         | 35                         | 177                        | 190                        | 4948                         | 14146                      | 62325                      | 161860                      | 467835                     | 1069045                    | 1637282                    | 1849188                    |
| N501Y        | 373                        | 469                        | 11873                      | 12081                      | 169174                       | 388294                     | 614750                     | 711234                      | 778190                     | 822805                     | 837129                     | 840571                     |
| E484K        | 82                         | 192                        | 487                        | 592                        | 9432                         | 31142                      | 60178                      | 77492                       | 97264                      | 116482                     | 122751                     | 124058                     |
| K417T        | 0                          | 0                          | 17                         | 40                         | 1508                         | 8481                       | 23113                      | 33295                       | 47315                      | 62212                      | 65836                      | 66643                      |
| S477N        | 12833                      | 14448                      | 16695                      | 17160                      | 22109                        | 26139                      | 29491                      | 31840                       | 33170                      | 34071                      | 34939                      | 35592                      |
| N439K        | 3971                       | 5435                       | 6625                       | 6872                       | 10027                        | 11899                      | 14295                      | 15617                       | 16505                      | 18474                      | 19124                      | 19388                      |
| K417N        | 19                         | 21                         | 90                         | 102                        | 1653                         | 3993                       | 6461                       | 7733                        | 9415                       | 11179                      | 11855                      | 12188                      |
| E484Q        | 19                         | 21                         | 34                         | 35                         | 201                          | 1062                       | 2682                       | 3102                        | 3624                       | 4953                       | 7010                       | 7926                       |
| F490S        | 25                         | 27                         | 37                         | 42                         | 388                          | 1633                       | 2740                       | 3155                        | 5971                       | 6350                       | 6572                       | 6702                       |
| G446V        | 36                         | 47                         | 57                         | 58                         | 122                          | 182                        | 376                        | 693                         | 1272                       | 2819                       | 4179                       | 4997                       |
| N440K        | 32                         | 46                         | 80                         | 84                         | 464                          | 892                        | 1741                       | 2987                        | 4091                       | 4485                       | 4847                       | 4995                       |
| S477I        | 112                        | 119                        | 135                        | 135                        | 186                          | 286                        | 401                        | 543                         | 1012                       | 1968                       | 2982                       | 3381                       |
| N501T        | 87                         | 232                        | 451                        | 479                        | 1382                         | 1672                       | 1880                       | 2013                        | 2265                       | 2346                       | 2429                       | 2527                       |
| A475V        | 27                         | 50                         | 65                         | 67                         | 123                          | 185                        | 559                        | 875                         | 1382                       | 1475                       | 1560                       | 1609                       |
| L455F        | 32                         | 35                         | 36                         | 36                         | 131                          | 304                        | 462                        | 574                         | 772                        | 1063                       | 1283                       | 1373                       |
| S477R        | 144                        | 250                        | 321                        | 329                        | 538                          | 740                        | 812                        | 839                         | 847                        | 883                        | 907                        | 924                        |
| L452M        | 54                         | 62                         | 66                         | 67                         | 137                          | 382                        | 632                        | 713                         | 791                        | 854                        | 874                        | 896                        |
| Y453F        | 161                        | 163                        | 177                        | 178                        | 185                          | 232                        | 241                        | 261                         | 276                        | 286                        | 310                        | 330                        |
| T478R        | 13                         | 17                         | 33                         | 37                         | 79                           | 90                         | 105                        | 150                         | 171                        | 236                        | 280                        | 303                        |
| Q498R        | 0                          | 0                          | 0                          | 0                          | 0                            | 0                          | 0                          | 5                           | 12                         | 35                         | 71                         | 207                        |
| F486L        | 90                         | 90                         | 138                        | 138                        | 139                          | 142                        | 144                        | 148                         | 150                        | 153                        | 155                        | 156                        |
| N481K        | 13                         | 37                         | 47                         | 47                         | 65                           | 98                         | 95                         | 103                         | 109                        | 129                        | 134                        | 134                        |

**Table S2. RBD mutations present in select SARS-CoV-2 variants.**

| Variant, WHO classification | Importance             | PANGO Lineage         | Country first detected     | RBD Mutations                                                                                                  |
|-----------------------------|------------------------|-----------------------|----------------------------|----------------------------------------------------------------------------------------------------------------|
| Alpha (α)                   | VOC                    | B.1.1.7               | United Kingdom             | N501Y                                                                                                          |
| Beta (β)                    | VOC                    | B.1.351               | South Africa               | K417N, E484K, N501Y                                                                                            |
| Gamma (γ)                   | VOC                    | P.1                   | Brazil                     | K417T, E484K, N501Y                                                                                            |
| Delta (δ)                   | VOC                    | B.1.617.2             | India                      | L452R, T478K                                                                                                   |
| Epsilon (ε)                 | VOI->VUM->reclassified | B.1.427/B.1.429       | USA                        | L452R                                                                                                          |
| Zeta (ζ)                    | VOI->VUM->reclassified | P.2                   | Brazil                     | E484K                                                                                                          |
| Eta (η)                     | VOI->VUM               | B.1.525               | Nigeria                    | E484K                                                                                                          |
| Theta (θ)                   | VOI->VUM->reclassified | P.3                   | The Philippines            | E484K, N501Y                                                                                                   |
| Iota (ι)                    | VOI->VUM               | B.1.526               | USA                        | S477N, E484K                                                                                                   |
| Kappa (κ)                   | VOI->VUM               | B.1.617.1             | India                      | L452R, E484Q                                                                                                   |
| Lambda (λ)                  | VOI                    | C.37                  | Peru                       | L452Q, F490S                                                                                                   |
| Mu (μ)                      | VOI                    | B.1.621               | Colombia                   | R346K, E484K, N501Y                                                                                            |
| Omicron (ο)                 | VOC                    | B.1.1.529             | South Africa               | G339D, S371L, S373P, S375F, K417N, N440K, G446S, S477N, T478K, E484A, Q493R, G496S, Q498R, N501Y, Y505H        |
| "Stealth" omicron           | VOC                    | BA.2                  | South Africa               | G339D, S371F, S373P, S375F, T376A, D405N, R408S, K417N, N440K, S477N, T478K, E484A, Q493R, Q498R, N501Y, Y505H |
| -                           | -                      | B.1.258               | Scotland                   | N439K                                                                                                          |
| -                           | -                      | A.28                  | France                     | E484K, N501T                                                                                                   |
| -                           | -                      | B.1.1.298 (cluster 5) | Denmark/Netherlands (mink) | Y453F                                                                                                          |

Single point mutations experimentally probed in the current study are highlighted in blue.

**Importance**

VOC variant of concern

VOI variant of interest

VUM variant under monitoring

reclassified Former VOCs/VOIs/VUMs, including their descendent lineages, that have been reclassified based on at least one the following criteria:

- (1) the variant is no longer circulating at levels of global public health significance,
- (2) the variant has been circulating for a long time without any impact on the overall epidemiological situation, or
- (3) scientific evidence demonstrates that the variant is not associated with any concerning properties.

**Table S3. Comparison of FEP to experimental SPR values and other theoretical methods.** Color code and notations as in Table 2. The length of FEP simulation slightly affects performance. Longer (100ns) FEP runs help with convergence and show slightly better performance compared to 10ns simulations.

| Complex                  | Mutation           | $\Delta\Delta G$<br>experiment<br>SPR | $\Delta\Delta G$<br>FEP<br>10ns | $\Delta\Delta G$<br>FEP<br>100ns | $\Delta\Delta G$<br>Mutabind2 | $\Delta\Delta G$<br>mCSM-<br>PPI2 | $\Delta\Delta G$<br>SAAMBE-<br>3D | $\Delta\Delta G$<br>BeAtMusic | $\Delta\Delta G$<br>FoldX | $\Delta\Delta G$<br>Rosetta flex<br>ddG | $\Delta\Delta G$<br>MM/PB-SA | $\Delta\Delta G$<br>MM/GB-SA |
|--------------------------|--------------------|---------------------------------------|---------------------------------|----------------------------------|-------------------------------|-----------------------------------|-----------------------------------|-------------------------------|---------------------------|-----------------------------------------|------------------------------|------------------------------|
| ACE2::RBD                | N501Y              | -0.8                                  | 0.6                             | -1.2                             | 0.7                           | 0.5                               | 0.0                               | 0.1                           | 6.0                       | 0.4                                     | 5.8                          | 2.6                          |
| ACE2::RBD                | Y453F              | -0.7                                  | -0.9                            | -0.6                             | -0.2                          | 0.1                               | 0.1                               | 0.3                           | -0.4                      | -0.2                                    | 1.3                          | 2.2                          |
| ACE2::RBD                | S477N              | -0.5                                  | -0.4                            | -0.1                             | -0.1                          | -0.1                              | 0.2                               | 0.1                           | 0.0                       | 0.1                                     | 5.4                          | 9.3                          |
| ACE2::RBD                | N501T              | -0.5                                  | -2.1                            | -1.8                             | -0.6                          | -0.9                              | -0.1                              | 0.4                           | -0.9                      | -0.4                                    | 3.1                          | 1.8                          |
| ACE2::RBD                | N439K              | -0.1                                  | -0.3                            | 0.6                              | -0.1                          | 0.5                               | 0.6                               | 0.3                           | 0.0                       | 0.0                                     | -8.8                         | -0.8                         |
| ACE2::RBD                | N440K              | 0.0                                   | -0.2                            | -0.4                             | 0.1                           | -0.1                              | 0.5                               | 0.0                           | -0.1                      | 0.0                                     | -1.9                         | -2.9                         |
| ACE2::RBD                | F490S              | 0.0                                   | -0.4                            | -0.1                             | 0.6                           | 0.2                               | 0.8                               | 0.7                           | 0.0                       | 0.0                                     | -1.0                         | 2.2                          |
| ACE2::RBD                | L452M              | 0.0                                   | 0.5                             | 0.2                              | 0.0                           | 0.5                               | -0.3                              | 0.2                           | 0.0                       | 0.0                                     | 6.3                          | 2.1                          |
| ACE2::RBD                | L452R              | 0.0                                   | -0.2                            | -0.3                             | -0.8                          | 0.0                               | 0.1                               | 0.2                           | -0.3                      | 0.0                                     | -6.8                         | -3.8                         |
| ACE2::RBD                | E484Q              | 0.1                                   | 0.7                             | 0.3                              | 0.1                           | 0.3                               | 0.5                               | 0.2                           | -0.1                      | 0.0                                     | 7.7                          | 11.3                         |
| ACE2::RBD                | T478K              | 0.1                                   | 0.0                             | 0.0                              | 0.2                           | 0.0                               | 0.1                               | 0.2                           | 0.0                       | 0.1                                     | 0.8                          | 4.9                          |
| ACE2::RBD                | N481K              | 0.1                                   | 0.1                             | -0.1                             | 0.0                           | 0.0                               | 0.6                               | 0.2                           | 0.0                       | 0.0                                     | -13.2                        | -7.4                         |
| ACE2::RBD                | E484K              | 0.1                                   | 0.5                             | 0.2                              | 0.2                           | 0.3                               | 0.3                               | 0.1                           | -0.2                      | -0.1                                    | 3.1                          | 7.2                          |
| ACE2::RBD                | Q498R              | 0.2                                   | 3.6                             | 2.7                              | 0.4                           | 1.4                               | 1.1                               | 0.8                           | -0.5                      | -0.6                                    | -1.0                         | -6.4                         |
| ACE2::RBD                | S477I              | 0.2                                   | -0.2                            | 0.0                              | 0.1                           | 0.0                               | 0.0                               | 0.2                           | 0.1                       | 0.0                                     | -1.3                         | 6.1                          |
| ACE2::RBD                | G446V              | 0.2                                   | -0.1                            | 0.4                              | -0.7                          | 0.1                               | -0.3                              | 1.3                           | 0.1                       | 0.0                                     | 6.0                          | 6.6                          |
| ACE2::RBD                | T478R              | 0.2                                   | 0.3                             | -0.1                             | 0.1                           | 0.0                               | 0.3                               | 0.2                           | 0.0                       | 0.0                                     | 1.6                          | 3.4                          |
| ACE2::RBD                | S477R              | 0.3                                   | -0.3                            | -0.2                             | 0.2                           | -0.1                              | 0.0                               | 0.1                           | 0.0                       | -0.2                                    | 0.6                          | 3.1                          |
| ACE2::RBD                | A475V              | 0.3                                   | -0.7                            | -1.1                             | 0.9                           | 0.0                               | 0.1                               | 0.1                           | 1.0                       | 0.2                                     | 10.0                         | 12.2                         |
| ACE2::RBD                | L455F              | 0.4                                   | 2.2                             | 1.7                              | 1.5                           | -0.7                              | 0.2                               | -0.1                          | 5.0                       | -0.6                                    | 6.5                          | 5.1                          |
| ACE2::RBD                | K417T              | 0.4                                   | 0.9                             | 0.9                              | 0.2                           | 0.4                               | 0.5                               | 0.5                           | 0.8                       | 0.7                                     | 11.4                         | 14.1                         |
| ACE2::RBD                | F486L              | 0.6                                   | 1.2                             | 1.3                              | 0.3                           | 0.9                               | 0.5                               | 0.7                           | 1.1                       | 1.8                                     | 5.9                          | 7.8                          |
| ACE2::RBD                | K417N              | 0.6                                   | 1.3                             | 0.9                              | 0.6                           | 0.5                               | 0.4                               | 0.5                           | 0.8                       | 0.9                                     | 12.2                         | 13.1                         |
| Dpr10/DIP- $\alpha$      | Dpr10 Q142M        | -1.3                                  | -0.2                            | -0.3                             | -0.1                          | 0.3                               | 0.4                               | -0.2                          | 0.0                       | 0.2                                     | -3.6                         | -1.6                         |
| Dpr10/DIP- $\alpha$      | DIP- $\alpha$ A78K | -1.1                                  | -1.0                            | -1.0                             | 0.5                           | -0.1                              | -1.4                              | 1.2                           | -0.5                      | -0.1                                    | 1.5                          | 5.6                          |
| Dpr6/DIP- $\alpha$       | DIP- $\alpha$ A78K | -1.0                                  | -0.9                            | -1.0                             | 0.8                           | -0.1                              | -1.3                              | 1.3                           | -0.3                      | -0.2                                    | 3.2                          | -2.5                         |
| Dpr6/DIP- $\alpha$       | DIP- $\alpha$ G74A | -0.5                                  | 0.9                             | 0.7                              | -1.0                          | 0.1                               | 0.8                               | 0.1                           | -0.3                      | 0.8                                     | 3.0                          | -1.1                         |
| Dpr6/DIP- $\alpha$       | DIP- $\alpha$ N94D | -0.5                                  | 0.4                             | 0.4                              | 1.4                           | 0.0                               | 0.9                               | 0.3                           | 0.1                       | 0.1                                     | 10.6                         | 1.4                          |
| Dpr10/DIP- $\alpha$      | DIP- $\alpha$ G74A | -0.4                                  | 1.4                             | 1.2                              | -0.1                          | 0.3                               | 0.7                               | -0.1                          | -0.3                      | 0.8                                     | -5.2                         | -0.6                         |
| Dpr10/DIP- $\alpha$      | DIP- $\alpha$ N94D | -0.1                                  | 0.4                             | 0.0                              | 1.1                           | 0.0                               | 0.5                               | 0.2                           | 0.1                       | 0.3                                     | -6.2                         | -3.0                         |
| Dpr6/DIP- $\alpha$       | DIP- $\alpha$ A82T | 0.9                                   | 2.2                             | 2.1                              | 1.1                           | -0.5                              | 0.2                               | 0.6                           | 1.9                       | 1.1                                     | 6.0                          | 0.5                          |
| Dpr10/DIP- $\alpha$      | Dpr10 V144K        | 1.3                                   | 3.4                             | 2.8                              | 0.5                           | 0.1                               | 0.3                               | 1.4                           | 0.5                       | 0.6                                     | -5.7                         | -0.5                         |
| Dpr6/DIP- $\alpha$       | DIP- $\alpha$ K81Q | 1.3                                   | 1.9                             | 1.8                              | 0.9                           | 0.9                               | 0.6                               | 0.9                           | 1.1                       | -0.3                                    | -1.3                         | -4.7                         |
| Dpr10/DIP- $\alpha$      | DIP- $\alpha$ A82T | 1.3                                   | 2.2                             | 2.1                              | 0.9                           | -0.6                              | 0.0                               | 0.4                           | 0.9                       | 0.3                                     | 0.4                          | 3.0                          |
| Dpr6/DIP- $\alpha$       | DIP- $\alpha$ G74L | 1.4                                   | 5.2                             | 3.6                              | 2.2                           | 0.5                               | 0.7                               | -0.1                          | 6.7                       | 4.6                                     | 8.8                          | 3.3                          |
| Dpr10/DIP- $\alpha$      | Dpr10 Q138D        | 1.4                                   | 2.4                             | 1.3                              | 2.7                           | 1.6                               | 0.7                               | 1.1                           | 3.8                       | 2.2                                     | 14.0                         | 2.6                          |
| Dpr10/DIP- $\alpha$      | DIP- $\alpha$ K81Q | 1.9                                   | 2.3                             | 2.4                              | 0.6                           | 0.7                               | 0.4                               | 0.8                           | 1.5                       | 0.8                                     | -8.0                         | -2.5                         |
| Dpr10/DIP- $\alpha$      | DIP- $\alpha$ G74L | 1.9                                   | 5.9                             | 4.4                              | 2.3                           | 0.6                               | 0.6                               | -0.3                          | 6.6                       | 3.4                                     | -1.9                         | 2.9                          |
| Dpr6/DIP- $\alpha$       | Dpr6 H110K         | 1.9                                   | 1.6                             | 1.6                              | 1.0                           | 0.4                               | 0.5                               | 0.6                           | 0.5                       | 0.8                                     | 15.5                         | 7.2                          |
| Dpr10/DIP- $\alpha$      | DIP- $\alpha$ I91A | 2.1                                   | 3.0                             | 2.9                              | 1.5                           | 0.9                               | 1.1                               | 2.0                           | 1.3                       | 0.9                                     | 3.3                          | 4.9                          |
| Dpr6/DIP- $\alpha$       | DIP- $\alpha$ I91A | 2.2                                   | 3.4                             | 3.4                              | 2.0                           | 0.8                               | 1.1                               | 1.8                           | 1.8                       | 1.0                                     | 9.1                          | 5.4                          |
| <b>ACE2::RBD dataset</b> |                    | PCC                                   | 0.5                             | 0.6                              | 0.3                           | 0.2                               | 0.3                               | 0.2                           | -0.1                      | 0.4                                     | 0.2                          | 0.3                          |
|                          |                    | RMSE                                  | 1.0                             | 0.8                              | 0.5                           | 0.5                               | 0.5                               | 0.5                           | 1.7                       | 0.5                                     | 6.5                          | 6.9                          |
| <b>DIP::Dpr dataset</b>  |                    | PCC                                   | 0.8                             | 0.9                              | 0.6                           | 0.5                               | 0.5                               | 0.3                           | 0.6                       | 0.4                                     | 0.2                          | 0.4                          |
|                          |                    | RMSE                                  | 1.7                             | 1.2                              | 1.0                           | 1.1                               | 1.1                               | 1.1                           | 1.9                       | 1.3                                     | 6.9                          | 3.1                          |
| <b>Combined dataset</b>  |                    | PCC                                   | 0.8                             | 0.8                              | 0.6                           | 0.4                               | 0.5                               | 0.4                           | 0.4                       | 0.5                                     | 0.2                          | 0.1                          |
|                          |                    | RMSE                                  | 1.3                             | 1.0                              | 0.8                           | 0.8                               | 0.8                               | 0.8                           | 1.8                       | 0.9                                     | 6.7                          | 5.6                          |
|                          |                    | MCC (stab)                            | 0.5                             | 0.5                              | 0.2                           | 0.0                               | 0.4                               | -                             | 0.4                       | 0.1                                     | -0.2                         | 0.1                          |
|                          |                    | MCC (dest)                            | 0.6                             | 0.7                              | 0.5                           | 0.6                               | 0.3                               | 0.6                           | 0.9                       | 0.7                                     | 0.1                          | 0.2                          |
|                          |                    | MCC (neutral)                         | 0.6                             | 0.6                              | 0.4                           | 0.4                               | 0.2                               | 0.4                           | 0.6                       | 0.6                                     | -0.1                         | -                            |
|                          |                    | MCC (triple class)                    | 0.6                             | 0.6                              | 0.4                           | 0.4                               | 0.3                               | 0.4                           | 0.7                       | 0.5                                     | -0.1                         | 0.1                          |
|                          |                    | p-value for PCC                       | 3.5E-09                         | 3.0E-11                          | 1.1E-05                       | 4.8E-03                           | 1.2E-03                           | 6.1E-03                       | 2.1E-03                   | 2.2E-04                                 | 1.3E-01                      | 2.3E-01                      |

**Table S4. Evaluating the reproducibility of FEP predictions on crystal structures.** Color code and notations as in Table 3.

| Complex            | Mutation           | $\Delta\Delta G$ experiment SPR kcal/mol | $\Delta\Delta G$ single 100ns FEP run (reported in Table S3) | Average $\Delta\Delta G \pm$ stdev (based on ten independent 100ns FEP runs) | SEM  |
|--------------------|--------------------|------------------------------------------|--------------------------------------------------------------|------------------------------------------------------------------------------|------|
| Dpr6/DIP- $\alpha$ | DIP- $\alpha$ A78K | -1.0                                     | -0.9                                                         | $-0.9 \pm 0.1$                                                               | 0.03 |
| ACE2::RBD          | N501Y              | -0.8                                     | -1.2                                                         | $-1.4 \pm 0.4$                                                               | 0.12 |
| ACE2::RBD          | Y453F              | -0.7                                     | -0.6                                                         | $-0.6 \pm 0.1$                                                               | 0.04 |
| Dpr6/DIP- $\alpha$ | DIP- $\alpha$ G74A | -0.5                                     | 0.7                                                          | $0.7 \pm 0.1$                                                                | 0.03 |
| ACE2::RBD          | S477N              | -0.5                                     | -0.1                                                         | $-0.1 \pm 0.1$                                                               | 0.04 |
| ACE2::RBD          | N501T              | -0.5                                     | -1.8                                                         | $-1.9 \pm 0.2$                                                               | 0.06 |
| ACE2::RBD          | G446V              | 0.2                                      | 0.4                                                          | $0.4 \pm 0.4$                                                                | 0.13 |
| ACE2::RBD          | A475V              | 0.3                                      | -1.1                                                         | $-0.9 \pm 0.1$                                                               | 0.04 |
| ACE2::RBD          | L455F              | 0.4                                      | 1.7                                                          | $1.7 \pm 0.3$                                                                | 0.08 |
| Dpr6/DIP- $\alpha$ | DIP- $\alpha$ A82T | 0.9                                      | 2.1                                                          | $2.1 \pm 0.2$                                                                | 0.06 |
| Dpr6/DIP- $\alpha$ | DIP- $\alpha$ K81Q | 1.3                                      | 1.8                                                          | $1.9 \pm 0.1$                                                                | 0.04 |
| Dpr6/DIP- $\alpha$ | DIP- $\alpha$ G74L | 1.4                                      | 3.6                                                          | $3.5 \pm 0.2$                                                                | 0.07 |



**Table S5. Comparison of binding affinity changes measured and calculated in the current study to previously reported computational predictions.  $\Delta\Delta G$  values are given in units of kcal/mol.**

| RBD mutation | $\Delta\Delta G$ , experiment, SPR, kcal/mol | $\Delta\Delta G$ FEP+, 100ns | $\Delta\Delta G$ FEP, Fratev | $\Delta\Delta G$ FEP, Huynh | $\Delta\Delta G$ FEP, Gumbart | $\Delta\Delta G$ TopNetTree, Wei | $\Delta\Delta G$ AMBER/MMPBSA, Pricl | $\Delta\Delta G$ PRODIGY/MMGBSA, Wei | $\Delta\Delta G$ PRODIGY/MMGBSA, Bahar | $\Delta\Delta G$ PRODIGY/MMPBSA, Zonta | $\Delta\Delta G$ NN_MMGBSA, Maranas with * | *-mutations NN_MMGBSA was trained on |
|--------------|----------------------------------------------|------------------------------|------------------------------|-----------------------------|-------------------------------|----------------------------------|--------------------------------------|--------------------------------------|----------------------------------------|----------------------------------------|--------------------------------------------|--------------------------------------|
| N501Y        | -0.8                                         | -1.2                         | -1.4                         | -0.8                        | -4.5                          | 0.0                              |                                      | 0.1                                  | -0.4                                   | 0.4                                    | -0.1                                       | N501Y*                               |
| S477N        | -0.5                                         | -0.1                         |                              |                             |                               | -0.1                             |                                      |                                      |                                        |                                        | -0.1                                       | S477N (S477D*)                       |
| L452R        | 0.0                                          | -0.3                         |                              |                             |                               | -2.5                             |                                      |                                      |                                        |                                        | -0.1                                       | L452R (L452K,Q*)                     |
| N439K        | -0.1                                         | 0.6                          |                              |                             |                               | -1.4                             |                                      |                                      |                                        |                                        | -0.1                                       | N439K*                               |
| E484K        | 0.1                                          | 0.2                          |                              |                             | -1.3                          | -0.9                             |                                      | -0.3                                 |                                        | -0.1                                   | -0.1                                       | E484K (E484R*)                       |
| K417N        | 0.6                                          | 0.9                          | 0.6                          |                             | 0.4                           | -1.8                             |                                      |                                      |                                        | 0.1                                    | 0.3                                        | K417N (K417E,R,V*)                   |
| K417T        | 0.4                                          | 0.9                          |                              |                             |                               | -1.1                             | 1.5                                  |                                      |                                        | 0.2                                    | 0.3                                        | K417T (K417E,R,V*)                   |
| N501T        | -0.5                                         | -1.8                         | -1.9                         |                             |                               | -1.4                             | -0.3                                 |                                      |                                        |                                        | -0.1                                       | N501T*                               |
| S477R        | 0.3                                          | -0.2                         |                              |                             |                               | -0.3                             |                                      |                                      |                                        |                                        |                                            |                                      |
| N440K        | 0.0                                          | -0.4                         |                              |                             |                               | -0.4                             |                                      |                                      |                                        |                                        | -0.1                                       | N440K*                               |
| T478K        | 0.1                                          | 0.0                          |                              |                             |                               | -0.2                             |                                      |                                      |                                        |                                        | -0.1                                       |                                      |
| F490S        | 0.0                                          | -0.1                         |                              |                             |                               | -0.6                             |                                      |                                      |                                        |                                        | -0.1                                       | F490S (F490K*)                       |
| E484Q        | 0.1                                          | 0.3                          |                              |                             |                               | 1.2                              |                                      |                                      |                                        |                                        | -0.1                                       | E484Q (E484R*)                       |
| Y453F        | -0.7                                         | -0.6                         |                              |                             |                               | -0.6                             |                                      |                                      |                                        |                                        | -0.1                                       | Y453F*                               |
| L452M        | 0.0                                          | 0.2                          |                              |                             |                               | -2.4                             |                                      |                                      |                                        |                                        |                                            |                                      |
| A475V        | 0.3                                          | -1.1                         |                              |                             |                               | 1.1                              |                                      |                                      |                                        |                                        |                                            |                                      |
| G446V        | 0.2                                          | 0.9                          |                              |                             |                               | 0.4                              |                                      |                                      |                                        |                                        |                                            |                                      |
| F486L        | 0.6                                          | 1.3                          |                              |                             |                               | -0.7                             |                                      |                                      |                                        |                                        |                                            |                                      |
| T478R        | 0.2                                          | -0.1                         |                              |                             |                               | 0.1                              |                                      |                                      |                                        |                                        |                                            |                                      |
| S477I        | 0.2                                          | 0.0                          |                              |                             |                               | -0.3                             |                                      |                                      |                                        |                                        |                                            |                                      |
| L455F        | 0.4                                          | 0.9                          |                              |                             |                               | 0.7                              |                                      |                                      |                                        |                                        |                                            |                                      |
| N481K        | 0.1                                          | -0.1                         |                              |                             |                               | 0.1                              |                                      |                                      |                                        |                                        |                                            |                                      |
| Q498R        | 0.2                                          | 2.7                          |                              |                             |                               | -0.3                             |                                      |                                      |                                        |                                        |                                            |                                      |
| PCC          |                                              | 0.6                          |                              |                             |                               | 0.0                              |                                      |                                      |                                        |                                        | 0.7                                        |                                      |
| RMSE         |                                              | 0.8                          |                              |                             |                               | 1.1                              |                                      |                                      |                                        |                                        | 0.3                                        |                                      |
